# Supplementary material for: Bio-electro degradation of azo-dye in a combined anaerobic–aerobic process along with energy recovery
Source: Royal Society of Chemistry journal article supplement (doi:10.1039/c5nj01610j), 2015-01-01
Supplement: c5nj01610j1.pdf [file c5nj01610j1.pdf]

## Bio-electro degradation of azo-dye in a combined anaerobic-aerobic process along with energy recovery

Saima Sultana<sup>1</sup>, Mohammad Danish Khan<sup>1</sup>, Suhail Sabir<sup>1</sup>, Khalid M. Gani<sup>2</sup>, Mohammad Oves<sup>3</sup>,  
Mohammad Zain Khan\*<sup>1</sup>

<sup>1</sup>Environmental Research Laboratory, Department of Chemistry, Aligarh Muslim University,  
Aligarh 202 002, Uttar Pradesh, India

<sup>2</sup>Environmental Engineering Section, Department of Civil Engineering, Indian Institute of  
Technology Roorkee- 247667, Uttarakhand, India

<sup>3</sup>Centre for Excellence in Environmental Studies, King Abdul Aziz University, Jeddah 22254,  
Kingdom of Saudi Arabia

### Electronic Supplementary Information

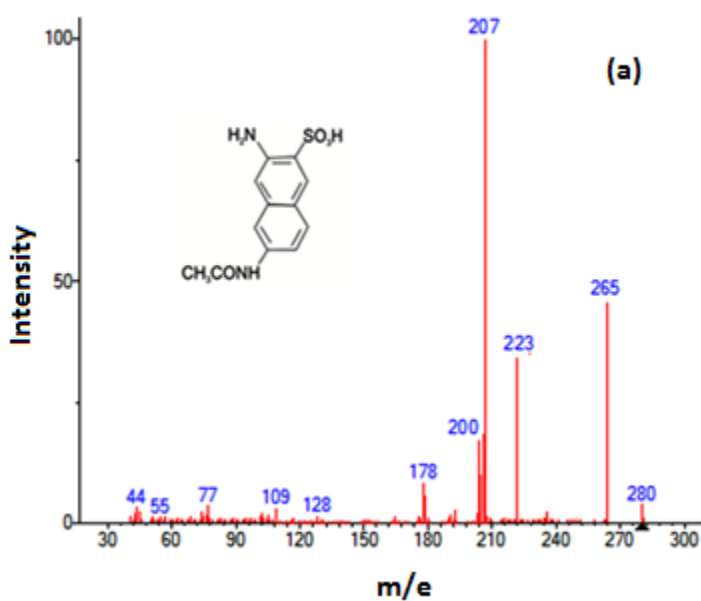

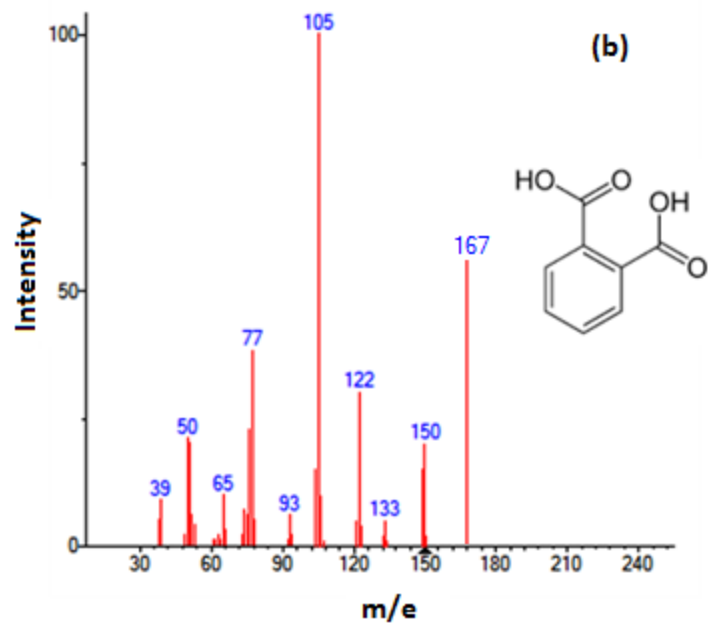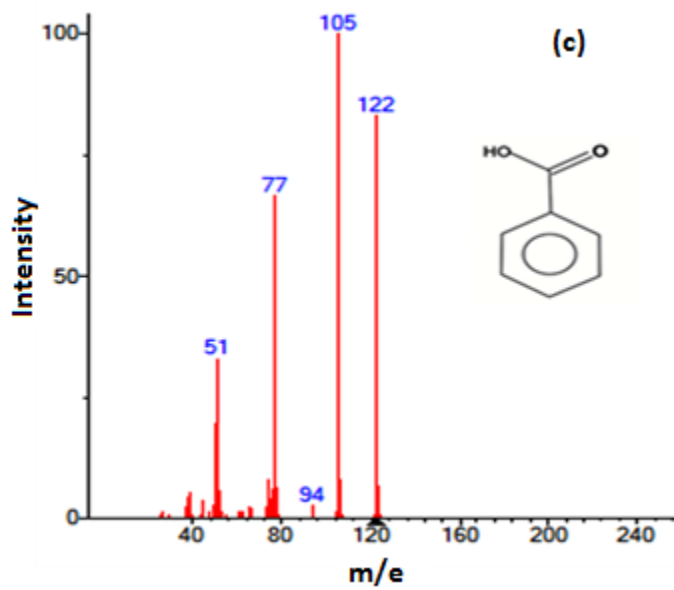

**Fig. S1.** Mass spectra of the degradation products (a) 6-acetylamino 3-amino naphthalene 2-sulfonic acid m/e 281; (b) Phthalic acid- (m+1) ion peak 166; (c) benzoic acid m/e 122
